# Supplementary material for: Developing an Anion Exchange Chromatography Assay for Determining Empty and Full Capsid Contents in AAV6.2
Source: PubMed Central journal article supplement — Mol Ther Methods Clin Dev. 2019 Sep 26;15:257–63. doi: 10.1016/j.omtm.2019.09.006 (PMC6838793; doi:10.1016/j.omtm.2019.09.006), 2019-09-26

**OMTM, Volume 15**

## **Supplemental Information**

### **Developing an Anion Exchange**

### **Chromatography Assay for Determining Empty**

### **and Full Capsid Contents in AAV6.2**

**Chunlei Wang, Sri Hari Raju Mulagapati, Zhongying Chen, Jing Du, Xiaohui Zhao, Guoling Xi, Liyan Chen, Thomas Linke, Cuihua Gao, Albert E. Schmelzer, and Dengfeng Liu**

**Figure S1.** Comparison of AAV6.2 separations under different mobile phase pHs: (A) 7.5, (B) 8.0, (C) 8.5, and (D) 9.0. Mobile phase condition: 70 mM Tris and 2 mM MgCl<sub>2</sub> with 0-250 mM (CH<sub>3</sub>)<sub>4</sub>NCl salt gradients in 25 min. Fluorescence detection was used.

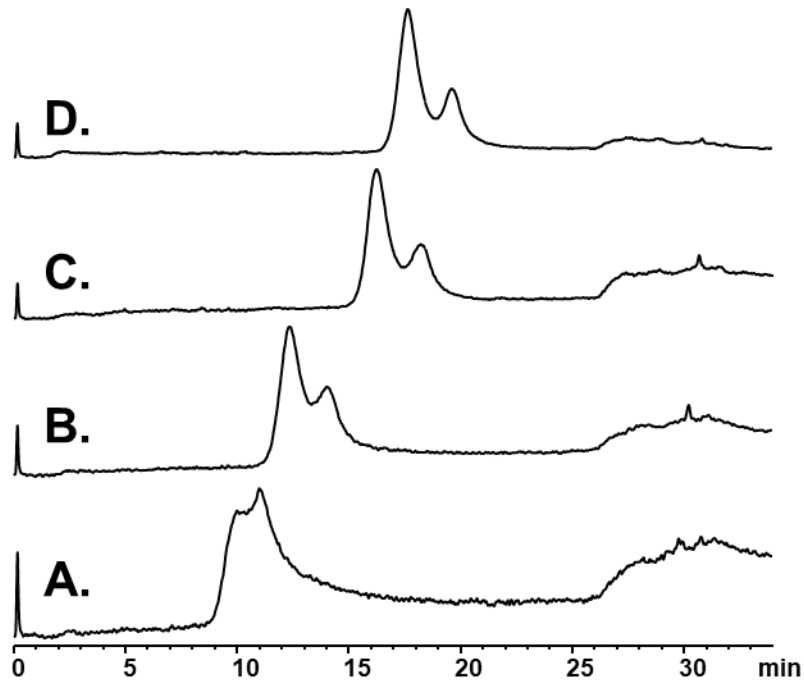

**Figure S2.** (A), normalized overlay of chromatograms for standards containing 0.0%, 8.8%, 17.0% and 24.5% empty capsids; (B), (C), (D), standards with 50.6%, 75.4% and 100% empty capsids, respectively. (E), Linearity curve of empty capsid percentage as monitored by fluorescence detector and corrected using relative response factors.

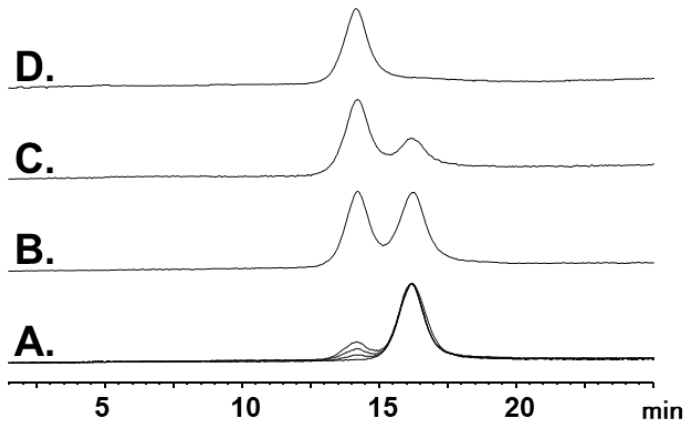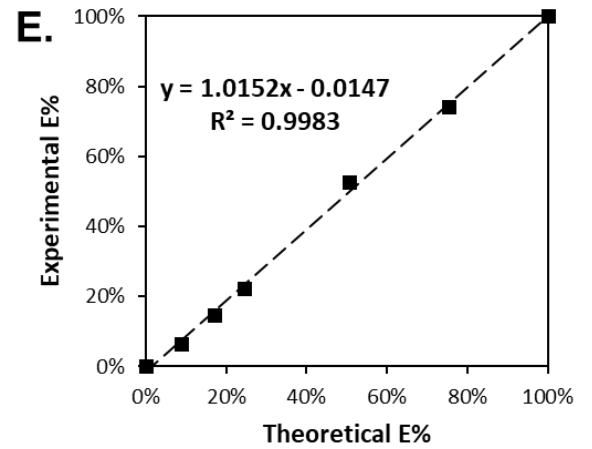

Supplement: mmc1.pdf [file mmc1.pdf]
